# Potent suppression of vascular smooth muscle cell migration and human neointimal hyperplasia by $K_v1.3$ channel blockers

Alex Cheong<sup>1,2†</sup>, Jing Li<sup>1,2†</sup>, Piruthivi Sukumar<sup>1,2</sup>, Bhaskar Kumar<sup>1,2</sup>, Fanning Zeng<sup>1,2</sup>, Kirsten Riches<sup>1,3</sup>, Christopher Munsch<sup>4</sup>, Ian C. Wood<sup>1,2</sup>, Karen E. Porter<sup>1,3</sup>, and David J. Beech<sup>1,2\*</sup>

<sup>1</sup>Multidisciplinary Cardiovascular Research Centre, University of Leeds, Leeds LS2 9JT, UK; <sup>2</sup>Faculty of Biological Sciences, Institute of Membrane and Systems Biology, Garstang Building, University of Leeds, Leeds LS2 9JT, UK; <sup>3</sup>School of Medicine, University of Leeds, Leeds LS2 9JT, UK; and <sup>4</sup>Department of Cardiac Surgery, Leeds General Infirmary, Great George Street, Leeds LS1 3EX, UK

Received 24 June 2010; revised 16 September 2010; accepted 20 September 2010; online publish-ahead-of-print 29 September 2010

Time for primary review: 28 days

|                            |                                                                                                                                                                                                                                                                                                                                                                                                                                                                                                                                                                                                                                                                                                                                                                                                                                                                                                                                                                                                                                                                  |
|----------------------------|------------------------------------------------------------------------------------------------------------------------------------------------------------------------------------------------------------------------------------------------------------------------------------------------------------------------------------------------------------------------------------------------------------------------------------------------------------------------------------------------------------------------------------------------------------------------------------------------------------------------------------------------------------------------------------------------------------------------------------------------------------------------------------------------------------------------------------------------------------------------------------------------------------------------------------------------------------------------------------------------------------------------------------------------------------------|
| <b>Aim</b>                 | The aim of the study was to determine the potential for $K_v1$ potassium channel blockers as inhibitors of human neointimal hyperplasia.                                                                                                                                                                                                                                                                                                                                                                                                                                                                                                                                                                                                                                                                                                                                                                                                                                                                                                                         |
| <b>Methods and results</b> | Blood vessels were obtained from patients or mice and studied in culture. Reverse transcriptase–polymerase chain reaction and immunocytochemistry were used to detect gene expression. Whole-cell patch-clamp, intracellular calcium measurement, cell migration assays, and organ culture were used to assess channel function. $K_v1.3$ was unique among the $K_v1$ channels in showing preserved and up-regulated expression when the vascular smooth muscle cells switched to the proliferating phenotype. There was strong expression in neointimal formations. Voltage-dependent potassium current in proliferating cells was sensitive to three different blockers of $K_v1.3$ channels. Calcium entry was also inhibited. All three blockers reduced vascular smooth muscle cell migration and the effects were non-additive. One of the blockers (margatoxin) was highly potent, suppressing cell migration with an $IC_{50}$ of 85 pM. Two of the blockers were tested in organ-cultured human vein samples and both inhibited neointimal hyperplasia. |
| <b>Conclusion</b>          | $K_v1.3$ potassium channels are functional in proliferating mouse and human vascular smooth muscle cells and have positive effects on cell migration. Blockers of the channels may be useful as inhibitors of neointimal hyperplasia and other unwanted vascular remodelling events.                                                                                                                                                                                                                                                                                                                                                                                                                                                                                                                                                                                                                                                                                                                                                                             |
| <b>Keywords</b>            | Potassium channels • Vascular smooth muscle cell • Neointimal hyperplasia • Cell migration                                                                                                                                                                                                                                                                                                                                                                                                                                                                                                                                                                                                                                                                                                                                                                                                                                                                                                                                                                       |

## 1. Introduction

Smooth muscle cells are well known for their contractile phenotype which determines the calibre of blood vessels; regulating blood pressure and local tissue perfusion. However, the cells also retain plasticity throughout the life, enabling marked transition away from contractile behaviour to motility, invasion, and proliferation. Plasticity is important in

vascular development, adaptation, and response to injury.<sup>1</sup> One consequence is the phenomenon of neointimal hyperplasia, which is the movement and proliferation of smooth muscle cells into the luminal area of a blood vessel, generating a new inner structure that can ultimately occlude blood flow.<sup>1–4</sup> It is observed in a variety of situations but is particularly striking for its tendency to cause failure of interventional clinical procedures that include the placement of stents and bypass grafts.

† These authors contributed equally to this work.

\* Corresponding author. Tel: +44 113 343 4323; fax: +44 113 343 4228, Email: dj.beech@leeds.ac.uk

Several mechanisms of smooth muscle plasticity have been determined,<sup>1</sup> but knowledge remains incomplete. An important feature is changes in the types of ion channel as the cells switch from the contractile to the proliferating phenotype.<sup>5</sup> The intracellular calcium ion ( $Ca^{2+}$ ) concentration is one of the key parameters controlled by the ion channels.<sup>6,7</sup> The removal of extracellular  $Ca^{2+}$  or addition of  $Ca^{2+}$  channel blockers inhibits smooth muscle cell proliferation.<sup>8–10</sup> Significantly, as the cells switch from the contractile to proliferating phenotype, there is loss of  $Ca_v1.2$  (the L-type voltage-dependent  $Ca^{2+}$  channel  $\alpha$ -subunit) but retention or up-regulation of other types of  $Ca^{2+}$  channels, including the channel components TRPC1, STIM1, and Orai1.<sup>4,11–17</sup> The suppression of TRPC channel function inhibits vascular smooth muscle cell migration and proliferation, whereas suppression of STIM1 or Orai1 has preferential inhibitory effects on cell migration.<sup>15,17</sup> Importantly, an anti-TRPC1-blocking antibody inhibited human neointimal hyperplasia<sup>4</sup> and knock-down of STIM1 inhibited neointimal formation in a rat model.<sup>18</sup> A consequence of the change to these other types of  $Ca^{2+}$  channel is that it is no longer membrane depolarization that is the trigger for  $Ca^{2+}$  entry, as is the situation in contractile cells where the L-type  $Ca^{2+}$  channels predominate; instead, it is hyperpolarization that causes increased  $Ca^{2+}$  influx by increasing the electrical driving force on  $Ca^{2+}$  entry through channels that are not gated by depolarization but are active across a wide range of voltages, which is the case with channels generated by TRPC, STIM1, or Orai1 proteins. Therefore, as in immune cells, ion channels that cause hyperpolarization become key players.<sup>19</sup> Potassium ion ( $K^+$ ) channels are primary candidates for mediating the effect.

As with  $Ca^{2+}$  channels, there are changes in  $K^+$  channel type as vascular smooth muscle cells switch from the contractile to proliferating phenotype.<sup>5</sup> As first described by Neylon *et al.*,<sup>20</sup> there is a transition from the large conductance  $K_{Ca}1.1$  ( $BK_{Ca}$ ) channel to the intermediate conductance  $Ca^{2+}$ -activated  $K^+$  channel  $K_{Ca}3.1$  ( $IK_{Ca}$ ). It is thought that a reason for the change is that  $K_{Ca}3.1$  is more active at negative membrane potentials, enabling it to confer the hyperpolarization necessary to drive  $Ca^{2+}$  entry. As predicted, inhibitors of  $K_{Ca}3.1$  suppress vascular smooth muscle cell proliferation, stenosis following injury, and neointimal hyperplasia.<sup>20–25</sup> Intriguingly,  $K_{Ca}3.1$  is also used by activated lymphocytes to drive  $Ca^{2+}$  entry.<sup>19,26</sup> In some situations, immune cells of this type also use one more  $K^+$  channel for driving  $Ca^{2+}$  entry, a member of the  $K_v1$  family called  $K_v1.3$ .<sup>19,27,28</sup> In this study, we investigated the relevance of  $K_v1$  channels to the proliferating vascular smooth muscle cell and human neointimal hyperplasia.

## 2. Methods

### 2.1 Tissues: cell and organ culture

For murine experiments, 8-week male C57/BL6 mice were killed by  $CO_2$  asphyxiation and cervical dislocation in accordance with the Code of Practice, UK Animals (Scientific Procedures) Act 1986. The thoracic aorta was removed and placed in ice-cold Hanks' solution. Endothelium was removed by brief luminal perfusion with 0.1% (v/v) Triton X-100 in water and the adventitia was removed by fine dissection.<sup>29</sup> Smooth muscle cells were enzymatically isolated<sup>29</sup> and studied immediately or after 14 days of culture (without passage) when cells were clearly proliferating and non-contractile. Freshly isolated mouse cells contracted strongly in response to extracellular ATP, whereas cells in culture showed no contraction or change in shape. Freshly discarded human saphenous veins were obtained

anonymously and with informed consent from adult patients undergoing coronary artery bypass graft surgery and with ethical approval from Leeds Teaching Hospitals Local Research Ethics Committee. Smooth muscle cells were grown in DMEM supplemented with 10% FCS, penicillin/streptomycin, and L-glutamine at 37°C in a 5%  $CO_2$  incubator; experiments were performed on cells passaged two to five times. All experiments on the intact vein involved paired comparisons of at least two adjacent vein segments from the same patient (one in control conditions and the other in the presence of the blocker). After 14 days of organ culture, neointimal hyperplasia was the new cellular layer that developed on the luminal aspect of the internal elastic lamina and was quantified using ImageJ software (NIH, USA).<sup>22</sup> All cells described as smooth muscle cells stained positively with an antibody to smooth muscle  $\alpha$ -actin and smooth muscle myosin heavy chain (see Supplementary material online, Figure S1).<sup>30</sup> The investigation conforms with the Guide for the Care and Use of Laboratory Animals published by the US National Institutes of Health (NIH Publication No. 85-23, revised 1996) and the principles outlined in the Declaration of Helsinki.

### 2.2 Quantification of channel expression

Methods were similar to those described previously.<sup>22,29</sup> Briefly, for quantification of mRNA abundance, total RNA was first extracted using Tri-reagent (Sigma) and DNase-treated RNA reverse-transcribed using enhanced AMV enzyme (Sigma). Real-time polymerase chain reaction (PCR) was then performed and its specificity verified by melt curve analysis, gel electrophoresis, controls in which reverse transcriptase (RT) was omitted, and direct sequencing of PCR products (Lark, UK). RNA abundance was normalized to the abundance of 16S mitochondrial rRNA, which was also analysed by real-time PCR and was not different between any of the data sets. Sequences of PCR primers are given in Supplementary material online, Table S1. Human cerebral cortex mRNA was from Ambion. For immunodetection of  $K_v1.3$  protein, vessels were fixed in 10% formalin for  $\geq 24$  h and embedded in paraffin wax. Five-micrometre sections were cut, hot-plated, dried overnight, and stored at 37°C until use. Dewaxing, rehydration, permeabilization, haematoxylin, and antibody staining using ABC kit (Vector Labs) were according to the standard protocols.  $K_v1.3$  was detected using a monoclonal anti- $K_v1.3$  antibody (clone L23/27; Antibodies Incorp., Davis, USA) and a rabbit anti- $K_v1.3$  polyclonal antibody.<sup>31</sup>

### 2.3 Ionic current and intracellular $Ca^{2+}$ recordings

Conventional whole-cell recording was performed at  $\sim 21^\circ C$  using an Axopatch 200B amplifier and pCLAMP-8 software (Molecular Devices). Signals were filtered at 1 kHz and sampled at 2 kHz. Patch pipettes had resistance of 3–5 M $\Omega$ . To the bath solution containing (in mM) NaCl (135), KCl (5), D-glucose (8), HEPES (10), and  $MgCl_2$  (4), 1  $\mu M$  gadolinium chloride ( $GdCl_3$ ) was added to suppress background current. The patch pipette solution contained (in mM): NaCl, 5; KCl, 130; HEPES, 10;  $Na_2ATP$ , 3;  $MgCl_2$ , 2; and EGTA, 5. The pH of solutions was titrated to pH 7.4 using NaOH. BSA (0.1%) was continuously present to minimize the non-specific binding of margatoxin. The solvent for correolide C, psora-4, and Tram-34 was DMSO ( $\leq 0.1\%$  v/v). For recording from HEK 293 cells stably expressing human  $K_{Ca}3.1$ , the patch pipette solution contained (in mM): KCl, 144; HEPES, 10;  $MgCl_2$ , 1.205;  $CaCl_2$ , 7.625; EGTA, 10; and the pH was titrated to pH 7.2 using KOH; free  $Ca^{2+}$  and  $Mg^{2+}$  concentrations were 300 nM and 1 mM, respectively. The bath solution was as indicated above. Intracellular  $Ca^{2+}$  was measured using fura-2AM (Invitrogen) on a real-time fluorescence 96-well plate reader (FlexStation, Molecular Devices). The recording medium contained (mmole/L): NaCl, 130; KCl, 5; D-glucose, 8; HEPES, 10;  $MgCl_2$ , 1.2; titrated to pH 7.4 with NaOH.  $Ca^{2+}$  was added to the medium as indicated in the figure legend.

## 2.4 Linear wound and cell migration assays

Smooth muscle cells were cultured on 24- (human) or 96 (mouse)-well plates to confluency and a 0.3 mm-wide scrape generated across each well (linear wound). Cells were treated with  $K_V1.3$  blockers for 48 h. Migration assays were performed using a modified Boyden chamber containing polycarbonate inserts with 8  $\mu\text{m}$  pores (BD Biosciences, Oxford, UK). In brief,  $1 \times 10^5$  cells were loaded in the upper chamber in DMEM supplemented with 0.4% FCS. The lower chamber contained 0.4% FCS supplemented with 10 ng/mL PDGF-BB and 10 ng/mL IL-1 $\alpha$  (Invitrogen). After incubation for 8 h at 37°C in a 5%  $\text{CO}_2$  incubator (with the blocker or vehicle), cells were scraped from the upper surface, duplicate membranes fixed, and migrated cells stained with haematoxylin and eosin. Cells were counted in 10 random fields, leading to an average number of cells per condition per patient.

## 2.5 Data analysis

Averaged data are expressed as mean  $\pm$  SEM. Data sets were obtained in test and control pairs even though single control bars are shown in the figures. Statistical analysis employed Student's *t*-tests with significant

difference indicated by an asterisk ( $P < 0.05$ ) and no significant difference by NS. Numbers of experiments are indicated by *n* (independent experiments on different human or mouse samples, or numbers of individual recordings for patch-clamp studies) and, in some cases, also *N* (number of replicates within an experiment, e.g. wells in a plate). RT-PCR and tissue staining were repeated independently on samples from three patients, yielding similar results.

## 3. Results

### 3.1 Up-regulated $K_V1.3$ mRNA in proliferating mouse aorta smooth muscle cells

A comparison was made of vascular smooth muscle cells in the contractile phenotype (acutely after isolation from the aorta) and the proliferating phenotype (in primary culture for 14 days). In contractile cells, RT-PCR detected mRNA species encoding six of the seven  $K_V1$  channels, but in proliferating cells, only mRNA encoding

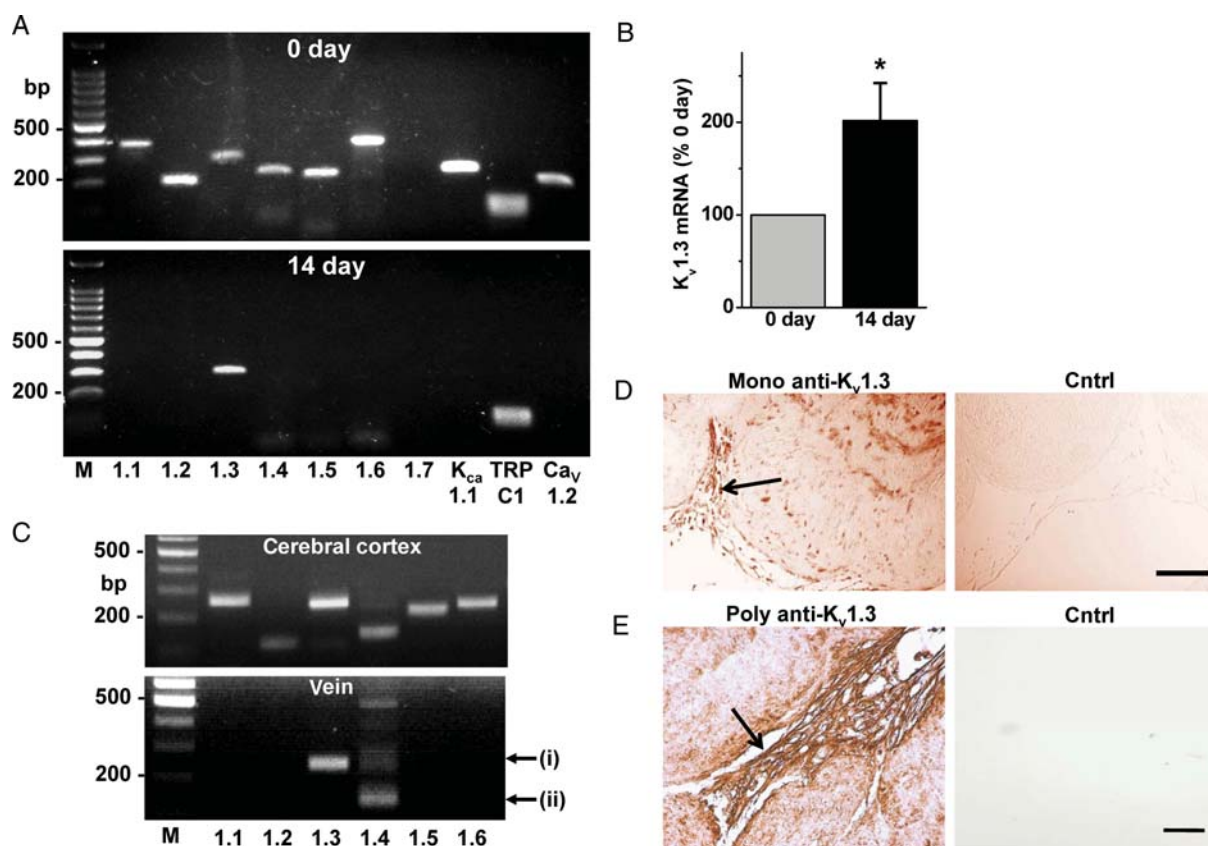

**Figure 1**  $K_V1.3$  expression in proliferating vascular smooth muscle cells. (A and B) Mouse cells. (C–E) Human cells and tissue. (A) Gels showing typical RT-PCR products from RNA of contractile cells (0 day, upper panel) and proliferating cells (14 days, lower panel). In each panel, the 100 bp DNA markers (M) are on the left and the lanes for the encoded channels are ordered from  $K_V1.1$  to  $Ca_V1.2$ . See Supplementary material online, Table S1 for predicted PCR amplicon sizes. (B) Paired mean data for  $K_V1.3$  mRNA abundance ( $n = 9$ ) showing doubling of expression in 14-day cells. (C) Typical RT-PCR products from RNA of the human cerebral cortex (upper gel, positive control) and saphenous vein smooth muscle cells (lower gel). PCR products for  $K_V1.3$  (i) and  $K_V1.4$  (ii) mRNAs are highlighted by arrows. Each is a representative of three independent experiments. (D and E)  $K_V1.3$  protein detection in neointima (arrows) of human saphenous vein segments after organ culture. Sections were stained with monoclonal (D) or polyclonal (E) antibody targeted to  $K_V1.3$ . The controls were mouse IgG (D) and the absence of primary antibody (E). Increased intensity in the images indicates increased positive staining. The control image in (E) contains a vein section but it is very faint relative to the vein stained with anti- $K_V1.3$  antibody. Scale bars are 50  $\mu\text{m}$ ; Cntrl, control.

$K_{V1.3}$  was detected (Figure 1A). Quantitative real-time PCR analysis showed that mRNA encoding  $K_{V1.3}$  increased in abundance in the proliferating cells (Figure 1B; see Supplementary material online, Figure S2). Expression of three other ion channels was detected for comparison (Figure 1A): consistent with previous reports, expression of mRNAs encoding  $K_{Ca1.1}$  and  $Ca_{V1.2}$  was lost, whereas expression of mRNA encoding TRPC1 was retained.<sup>4,11–13</sup> Therefore, the experimental system reflected established features of vascular remodelling and the data suggest that  $K_{V1.3}$  mRNA is an exception among the  $K_{V1}$  mRNA species, being retained and up-regulated when vascular smooth muscle cells switch to the proliferating phenotype.

### 3.2 $K_{V1.3}$ mRNA and protein in proliferating human vein smooth muscle cells

To investigate the relevance to human neointimal hyperplasia, mRNA was isolated from cultures of human saphenous vein smooth muscle cells. With regard to the  $K_{V1}$  channels, only mRNA encoding  $K_{V1.3}$  was robustly detected (Figure 1C, i). Small amounts of mRNA encoding  $K_{V1.4}$  may have been present but a specific product could not be isolated, suggesting exceptionally low expression (Figure 1C, ii). Freshly isolated cells from the human vein were not investigated because of concern that the cells would already be partially remodelled in

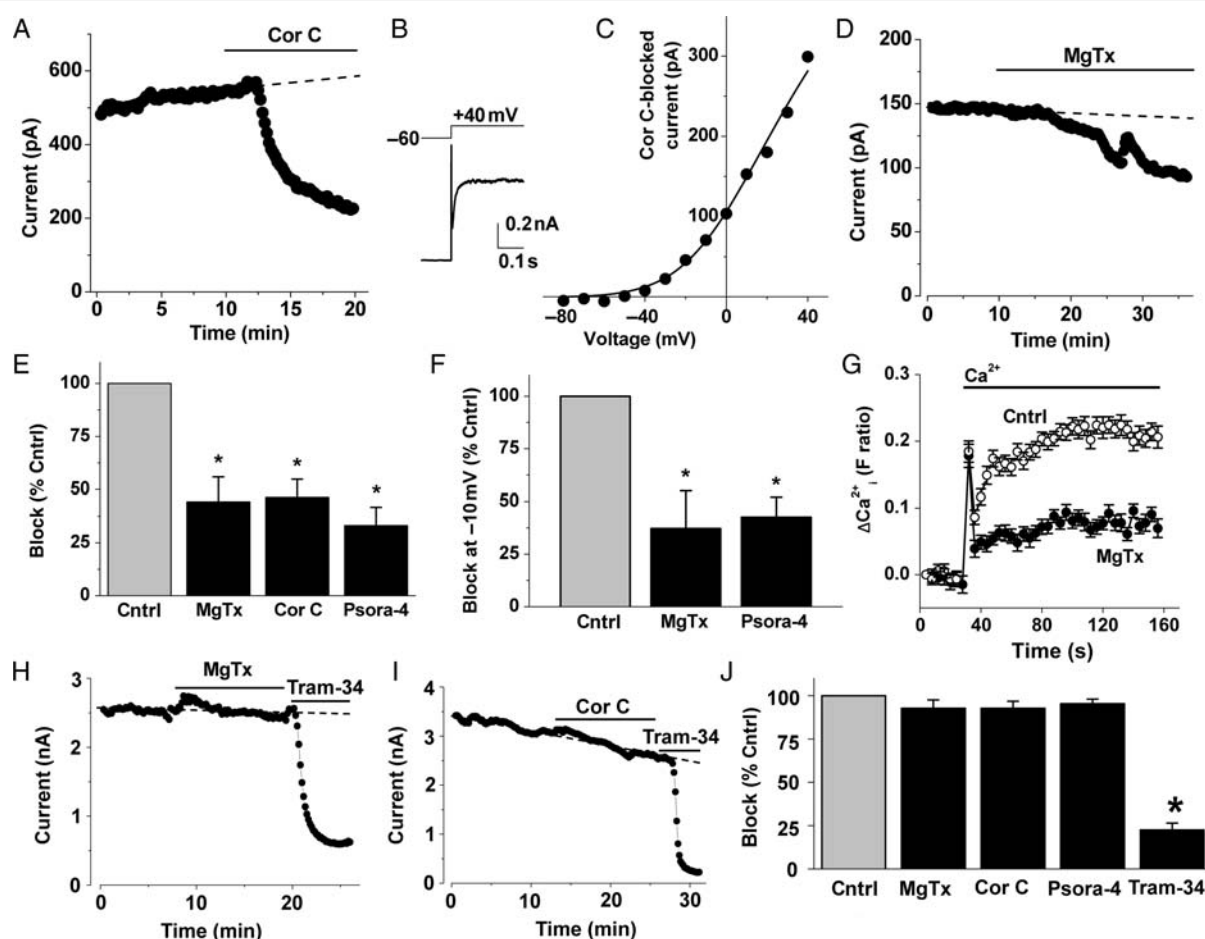

**Figure 2** Effects of  $K_{V1.3}$  blockers on ionic current and intracellular  $Ca^{2+}$ . Data from proliferating human saphenous vein smooth muscle cells (A–G) or HEK 293 cells stably expressing  $K_{Ca3.1}$  (H–J). All patch-clamp experiments used a holding potential of  $-60$  mV. (A) Example currents (black circles) evoked by stepping to  $+40$  mV for  $0.5$  s at  $0.1$  Hz, showing block by  $1$   $\mu$ M correalide compound C (Cor C). (B) Typical Cor C-sensitive current during a single voltage step. The initial upward spike is residual capacitance current. (C) Typical current–voltage relationship ( $I-V$ ) for Cor C-sensitive current generated used  $0.5$  s incremental  $10$  mV depolarizing pulses at  $0.1$  Hz. The smooth curve is a fitted Boltzmann–Ohm’s Law function. (D) As for (A) but showing block by  $5$  nM margatoxin (MgTx). (E) Mean data for the effects of MgTx, Cor C, and Psora-4 ( $5$  nM) on linear leak-subtracted currents at  $+40$  mV ( $n = 6, 4,$  and  $4$ , respectively). Current amplitudes after the blocker had had maximum effect were normalized to amplitudes before each blocker was applied. Each blocker had its own control (Cntrl). (F) As for (E) except currents were measured at  $-10$  mV; Cor C data were not obtained because a single step to  $+40$  mV was used in the experiments. (G) Intracellular  $Ca^{2+}$  indicated by the change in fura-2 fluorescence ratio. Cells were pre-treated with thapsigargin ( $1$   $\mu$ M) to stimulate  $Ca^{2+}$ -entry channels and then extracellular  $Ca^{2+}$  ( $0.2$  mM) was added with or without the presence of  $5$  nM MgTx ( $n/N = 4/48$ ). (H and I) Typical currents evoked by stepping to  $+40$  mV showing lack of effect of  $5$  nM margatoxin (H) and  $1$   $\mu$ M Cor C (I). Block by the  $K_{Ca3.1}$  inhibitor Tram-34 ( $200$  nM) confirmed that the majority of current was carried by  $K_{Ca3.1}$ . (J) Mean data showing lack of effect of MgTx, Cor C, and  $5$  nM Psora-4 on  $K_{Ca3.1}$  but block by Tram-34 ( $n = 5, 3, 4,$  and  $14$ ). For each agent, current at the end of the period of application was normalized to its own control current before the application.

samples from such patients. To determine the relevance to newly remodelling smooth muscle cells *in situ*, we grew neointimal formations within segments of the human saphenous vein; these formations are variable in shape and less dense than the original vessel, containing almost exclusively smooth muscle cells.<sup>22</sup> K<sub>V</sub>1.3 protein was detected using two different anti-K<sub>V</sub>1.3 antibodies: a mouse monoclonal antibody (Figure 1D) and a rabbit polyclonal antibody (Figure 1E). With either detection antibody, expression of K<sub>V</sub>1.3 was found to be higher in the neointima compared with the pre-existing vein (Figure 1D and E).

### 3.3 Function of K<sub>V</sub>1.3 protein in K<sup>+</sup> currents and Ca<sup>2+</sup> entry

To investigate whether there are functional K<sub>V</sub>1.3 channels, we used patch-clamp recording to elicit voltage-dependent K<sup>+</sup> current in human vein smooth muscle cells. Three chemically distinct K<sub>V</sub>1.3 channel blockers were tested for effect: margatoxin, correolide compound C, and psora-4.<sup>29,31–36</sup> Depolarizing voltage steps evoked voltage-dependent K<sup>+</sup> current (Figure 2A and B) that had an activation threshold near -40 mV (Figure 2C), as expected for K<sub>V</sub>1 channels.<sup>27</sup> The current measured at +40 mV was partially inhibited by correolide compound C, margatoxin, or psora-4 (Figure 2A–E). The percentage inhibition caused by each agent was the same, suggesting a common site of action (Figure 2E). At negative (physiological) voltages, currents were small and therefore difficult to measure reliably, but they were nevertheless found to be significantly inhibited at -10 mV (Figure 2F). Further evidence for physiologically relevant

K<sub>V</sub>1.3 came from intracellular Ca<sup>2+</sup> measurement experiments where margatoxin significantly suppressed Ca<sup>2+</sup> entry, consistent with the existence of a channel that contributes to the enhancement of the electrical attraction for the inward movement of the positively charged Ca<sup>2+</sup> ion (Figure 2G). K<sub>V</sub>1.3 channel blockers showed selectivity because they had no effects on K<sub>Ca</sub>3.1 channel currents (Figure 2H–J). The data suggest that functional K<sub>V</sub>1.3 channels are present in proliferating vascular smooth muscle cells.

### 3.4 Effects of K<sub>V</sub>1.3 blockers on migration of mouse and human vascular smooth muscle cells

To investigate the relevance to cell function, we first used a model of vascular injury where a linear wound is made in the cell culture, removing cells from a defined region. Cells responded by regrowing into the wound (Figure 3A). At a fixed time point, the number of cells in the wound was counted. Margatoxin or correolide compound C was tested and found to reduce the number of cells in the wound, suggesting decreased capacity for response to injury (Figure 3A and B). Effects on human cells were quantitatively less than for murine cells, suggesting greater dependence on K<sub>V</sub>1.3 in the mouse (Figure 3A). Experiments were also performed on human cells using a Boyden chamber to explore growth factor-directed cell migration. Again K<sub>V</sub>1.3 blockers were inhibitory (Figure 3C). The effects of the blockers reached a limiting value and were not additive, consistent with all of the blockers affecting a common mechanism (Figure 3C). Concentration–response data for margatoxin revealed that the IC<sub>50</sub>

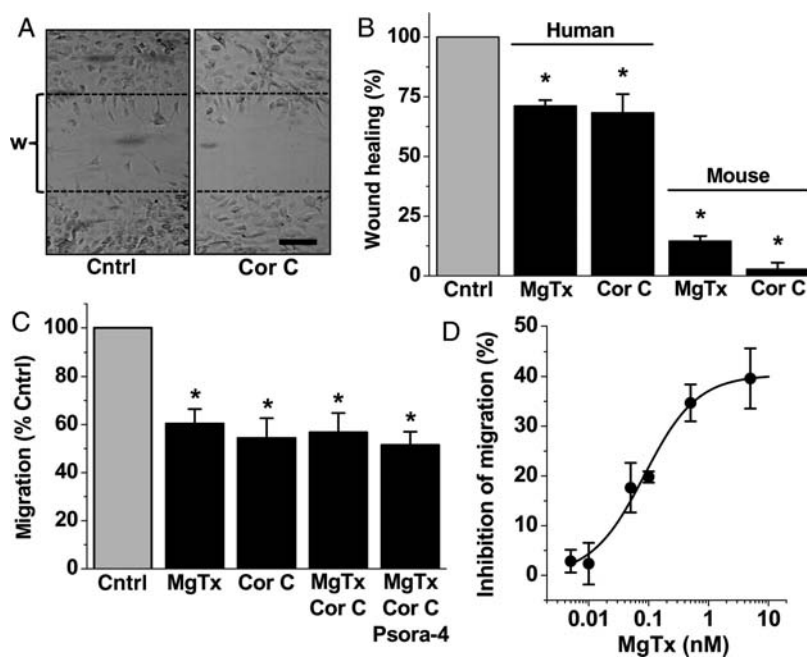

**Figure 3** Actions of K<sub>V</sub>1.3 blockers on vascular smooth muscle cell migration and response to injury. All data are from human cells except for part of (B). (A) Typical images of cells after creation of a linear wound (w) delineated by the two dashed lines and making a paired comparison of cells without (control) and with 1 μM Cor C. Scale bar, 100 μm. (B) As for (A) but mean data for numbers of cells entering the wound in the presence of the indicated blocker normalized to its own control group ( $n = 3$  for each); for 5 nM MgTx, the control was BSA, and for 1 μM Cor C, it was DMSO. (C and D) Mean data from the Boyden chamber cell migration assays comparing effects of MgTx (5 nM unless specified differently in D), Cor C (1 μM), and Psora-4 (5 nM) ( $n = 4$  each). (C) Each blocker group was different from its own control (\*) but blocker groups were not significantly different from each other. (D) As for (C) but concentration–response data for MgTx with a fitted Hill equation (IC<sub>50</sub> 85 pM, slope 0.99).

was 85 pM (Figure 3D), which is similar to the potency previously reported against  $K_V1.3$  channels.<sup>28,32</sup> The data suggest that  $K_V1.3$  has a positive role in vascular smooth muscle cell migration and that margatoxin is a high-potency inhibitor of vascular cell migration.

### 3.5 Function of $K_V1.3$ in human neointimal hyperplasia

To determine the relevance to human vascular smooth muscle cells *in situ*, we generated neointimal formations in organ cultures of segments of the saphenous vein, as indicated above. Neointima were compared in paired vein segments from the same patient, one in the presence of the vehicle control and the other in the  $K_V1.3$  blocker (Figure 4A–D). Treatment with margatoxin inhibited neointimal growth in all four patient samples, averaging  $39.87 \pm 11.02\%$  inhibition ( $P < 0.05$ ) (Figure 4E). Correlide compound C was effective in four out of five patient samples, giving an average inhibition of  $60.39 \pm 16.19\%$  ( $P < 0.05$ ) (Figure 4F). The data suggest that  $K_V1.3$  channels have a positive role in human neointimal hyperplasia.

## 4. Discussion

The data suggest that  $K_V1.3$  is important in proliferating vascular smooth muscle cells. It is exceptional among the  $K_V1$  proteins in having preserved and up-regulated expression when the cells switch to their proliferating and migratory phenotype. The proliferating cells exhibit  $K^+$  currents and other functional signals that are sensitive to inhibition by a range of established blockers of  $K_V1.3$  channels acting in a non-additive manner that is consistent with effects via a common protein,  $K_V1.3$ . The blockers exhibit high potency against

human vascular smooth muscle cell migration, in particular margatoxin which acts with an  $IC_{50}$  of 85 pM. Results with organ cultures of saphenous veins suggest the potential for  $K_V1.3$  blockers as suppressors of neointimal hyperplasia and other unwanted vascular smooth muscle cell remodelling events in humans.

Previous studies have established the  $K_V1$  family of  $K^+$  channels as contributors to the control of physiological vascular tone, showing that they provide negative feedback against depolarizing signals in contractile arterial smooth muscle cells.<sup>31,37–39</sup> Although  $K_V1.3$  has been detected in contractile cells, functional importance has mostly been attributed to other  $K_V1$  subunits (especially  $K_V1.2$  and  $K_V1.5$ ). Without excluding contribution of  $K_V1.3$  in contractile cells, our observations suggest that  $K_V1.3$  has a more distinctive role in vascular adaptation, with little or no involvement of other  $K_V1$  subunits. The findings are consistent with a recent report suggesting significance of  $K_V1.3$  in cells of the injured mouse femoral artery.<sup>40</sup> The event of losing other  $K_V1$  subunits may somehow be functionally significant in phenotypic switching,<sup>41</sup> but the mechanism by which this would be important is unclear and the channel subunits cannot be targets for pharmacological agents in remodelling because they are not expressed once the cells switch phenotype. All of the  $K_V1$  changes should be seen within the context of a wider and quite comprehensive alteration in the ion channel expression pattern as smooth muscle cells switch phenotype.<sup>5</sup>

The association of  $K_V1.3$  with vascular smooth muscle cell adaptation is intriguing because this channel is already linked to the proliferation of lymphocytes, oligodendrocytes, and cancer cells.<sup>19,42–44</sup> Therefore, the channel may be a fundamental element of proliferating cells.  $K_{Ca}3.1$  is similarly linked to cell proliferation and can co-ordinate with  $K_V1.3$ .<sup>19,28</sup> In lymphocytes,  $K_V1.3$  dominates over  $K_{Ca}3.1$  during

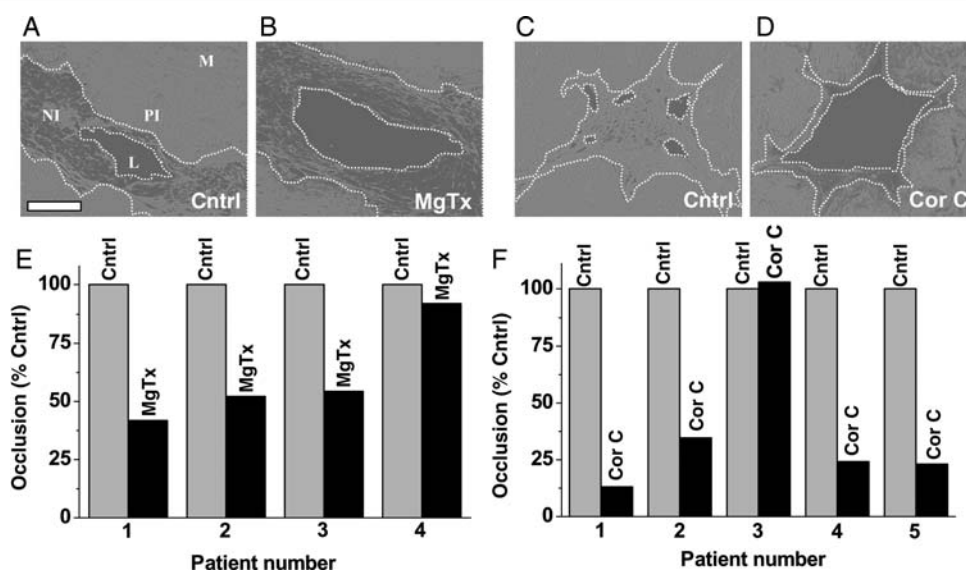

**Figure 4** Inhibition of neointimal hyperplasia in human saphenous vein segments. (A–D) Typical images of cross-sections of the vein after organ culture, showing auto-fluorescence (light grey or white). The panel in (A) labels the structure: L, lumen; NI, neointima; PI, pre-existing intima; M, media; the scale bar is 100 μm. In all images, edges of L and NI are indicated by dotted lines. (A and B) Paired experiment on vein from one patient comparing vehicle control (A) and 5 nM MgTx (B). (C and D) Vehicle control compared with 1 μM Cor C. (E and F) Paired individual data for veins from four (E) and five patients (F). The area of NI in the presence of MgTx or Cor C is given as a percentage of its area in the corresponding control.

chronic inflammation, such that blockers of  $K_V1.3$  are suggested as new therapeutic agents in the treatment of diseases relating to chronic immune responses, including multiple sclerosis.<sup>19,28</sup>

Because we detected little or no expression of other  $K_V1$  genes, and  $K_V1$  proteins are not thought to mix with other types of  $K_V$  protein, our vascular smooth muscle cell data seem to be explained by  $K_V1.3$  acting alone (i.e. as a homotetramer). We found that  $K_V1.3$  mRNA and protein were expressed alone, there was  $K_V1$ -like  $K^+$  current, and there were effects of three agents at concentrations that are known to block  $K_V1.3$  and do not block  $K_{Ca}3.1$ .<sup>29,33,36</sup> However, the voltage-dependent  $K^+$  current observed, although similar in some regards to the current generated by over-expressed  $K_V1.3$ , showed little or no inactivation, which contrasts with many reports of the character of heterologously over-expressed  $K_V1.3$  channels. We do not know the reason for the difference but speculate on two possibilities: one possibility is that there is an unknown auxiliary subunit in vascular smooth muscle cells that modifies the inactivation properties of  $K_V1.3$ . Another possibility is that there is tonic phosphorylation of the channels; Src-dependent phosphorylation strongly decreases the rate of inactivation of  $K_V1.3$ <sup>45</sup> and is a common feature of proliferating vascular smooth muscle cells. Unfortunately, despite investigating eight different short-interfering RNA molecules targeted to  $K_V1.3$  mRNA and independently validating our methodology via other targets,<sup>15</sup> we were unable to modify  $K_V1.3$  expression and therefore provide evidence using molecular tools that  $K_V1.3$  is involved in the human cells.

The  $K_V1.3$  blockers reduced migration of human vascular smooth muscle cells but it was evident that there was not complete inhibition (only ~40%). This result indicates that there is a component of cell migration that depends on  $K_V1.3$  and a component that does not. We speculate that this situation arises because the  $K^+$  channels have a modulator function on cell migration, acting by causing hyperpolarization that enhances  $Ca^{2+}$  entry through non-voltage-gated  $Ca^{2+}$  channels that arise from proteins such as TRPC1 and STIM1. According to this hypothesis, the blockade of the  $K_V1.3$   $K^+$  channels should suppress  $Ca^{2+}$  entry, which is what we observed (Figure 2G). We previously observed a similar effect with the blockade of another  $K^+$  channel,  $K_{Ca}3.1$  blockade.<sup>22</sup> The mechanism by which the  $Ca^{2+}$  entry facilitates cell migration is unclear and thus requires investigation.

The data suggest the potential for  $K_V1.3$  blockers in therapies against unwanted vascular remodelling, especially if the remodelling is accompanied by aggravating chronic inflammatory reactions that involve  $K_V1.3$ -expressing immune cells. Although vasoconstrictor effects of margatoxin have been observed in some arteries,<sup>31</sup> elevated blood pressure has not appeared as a significant concern during *in vivo* exploration of  $K_V1.3$  blockers for the treatment of multiple sclerosis,<sup>19,28</sup> perhaps, because  $K_V1.5$  is commonly expressed in contractile smooth muscle cells and is resistant to many of the agents that block  $K_V1.3$ , or because the roles of the  $K_V1$  channels can be taken by other voltage-gated  $K^+$  channels including  $K_V2$ ,  $K_V7$ , and  $K_{Ca}1.1$ .

$K_V1.3$  has often been viewed as an immune cell-specific  $K^+$  channel but is now emerging also as a channel of proliferating vascular smooth muscle cells and other proliferating cell types. It reflects one of several similarities in the ion channels of immune cells and vascular smooth muscle cells, including  $K_{Ca}3.1$ , TRPC, STIM1, and Orai1 channel subunits. The availability of potent  $K_V1.3$  channel blockers will facilitate further research in the area and provide foundations for possible new cardiovascular therapies.

## Supplementary material

Supplementary material is available at *Cardiovascular Research* online.

## Acknowledgements

We thank G. Kaczorowski (Merck) for correolide compound C and H. Wulff (University of California Davis) for Tram-34. We thank H.G. Knaus (Innsbruck, Austria) for polyclonal anti- $K_V1.3$  antibody and G. Richards (University of Manchester) for HEK 293 cells stably expressing human  $K_{Ca}3.1$ .

**Conflict of interest:** none declared.

## Funding

The work was supported by the British Heart Foundation, Medical Research Council, Nuffield Hospital Leeds, and Wellcome Trust. Funding to pay the Open Access publication charge was provided by the Wellcome Trust.

## References

- Owens GK, Kumar MS, Wamhoff BR. Molecular regulation of vascular smooth muscle cell differentiation in development and disease. *Physiol Rev* 2004;**84**:767–801.
- Angelini GD, Jeremy JY. Towards the treatment of saphenous vein bypass graft failure—a perspective of the Bristol Heart Institute. *Biorheology* 2002;**39**:491–499.
- Mitra AK, Agrawal DK. In stent restenosis: bane of the stent era. *J Clin Pathol* 2006;**59**:232–239.
- Kumar B, Dreja K, Shah SS, Cheong A, Xu SZ, Sukumar P et al. Upregulated TRPC1 channel in vascular injury *in vivo* and its role in human neointimal hyperplasia. *Circ Res* 2006;**98**:557–563.
- Beech DJ. Ion channel switching and activation in smooth-muscle cells of occlusive vascular diseases. *Biochem Soc Trans* 2007;**35**:890–894.
- Munaron L, Antoniotti S, Lovisolo D. Intracellular calcium signals and control of cell proliferation: how many mechanisms? *J Cell Mol Med* 2004;**8**:161–168.
- Clapham DE. Calcium signaling. *Cell* 2007;**131**:1047–1058.
- Magnier-Gaubil C, Herbert JM, Quarck R, Papp B, Corvazier E, Wuytack F et al. Smooth muscle cell cycle and proliferation. Relationship between calcium influx and sarco-endoplasmic reticulum  $Ca^{2+}$  ATPase regulation. *J Biol Chem* 1996;**271**:27788–27794.
- Vallot O, Combettes L, Jourdan P, Inamo J, Marty I, Claret M et al. Intracellular  $Ca^{2+}$  handling in vascular smooth muscle cells is affected by proliferation. *Arterioscler Thromb Vasc Biol* 2000;**20**:1225–1235.
- Landsberg JW, Yuan JX. Calcium and TRP channels in pulmonary vascular smooth muscle cell proliferation. *News Physiol Sci* 2004;**19**:44–50.
- Gollasch M, Haase H, Ried C, Lindschau C, Morano I, Luft FC et al. L-type calcium channel expression depends on the differentiated state of vascular smooth muscle cells. *FASEB J* 1998;**12**:593–601.
- Quignard JF, Harricane MC, Menard C, Lory P, Nargeot J, Capron L et al. Transient down-regulation of L-type  $Ca^{2+}$  channel and dystrophin expression after balloon injury in rat aortic cells. *Cardiovasc Res* 2001;**49**:177–188.
- Golovina VA, Platoshyn O, Bailey CL, Wang J, Limsuwan A, Sweeney M et al. Upregulated TRP and enhanced capacitative  $Ca^{2+}$  entry in human pulmonary artery myocytes during proliferation. *Am J Physiol Heart Circ Physiol* 2001;**280**:H746–H755.
- Berra-Romani R, Mazzocco-Spezia A, Pulina MV, Golovina VA.  $Ca^{2+}$  handling is altered when arterial myocytes progress from a contractile to a proliferative phenotype in culture. *Am J Physiol Cell Physiol* 2008;**295**:C779–C790.
- Li J, Sukumar P, Milligan CJ, Kumar B, Ma ZY, Munsch CM et al. Interactions, functions, and independence of plasma membrane STIM1 and TRPC1 in vascular smooth muscle cells. *Circ Res* 2008;**103**:e97–e104.
- Baryshnikov SG, Pulina MV, Zulian A, Linde CI, Golovina VA. Orai1, a critical component of store-operated  $Ca^{2+}$  entry, is functionally associated with  $Na^+/Ca^{2+}$  exchanger and plasma membrane  $Ca^{2+}$  pump in proliferating human arterial myocytes. *Am J Physiol Cell Physiol* 2009;**297**:C1103–C1112.
- Bisailon JM, Motiani RK, Gonzalez-Cobos JC, Potier M, Halligan KE, Alzawahra WF et al. Essential role for STIM1/Orai1-mediated calcium influx in PDGF-induced smooth muscle migration. *Am J Physiol Cell Physiol* 2010;**298**:C993–C1005.
- Guo RW, Wang H, Gao P, Li MQ, Zeng CY, Yu Y et al. An essential role for stromal interaction molecule 1 in neointima formation following arterial injury. *Cardiovasc Res* 2009;**81**:660–668.
- Beeton C, Chandy KG. Potassium channels, memory T cells, and multiple sclerosis. *Neuroscientist* 2005;**11**:550–562.
- Neylon CB, Lang RJ, Fu Y, Bobik A, Reinhart PH. Molecular cloning and characterization of the intermediate-conductance  $Ca^{2+}$ -activated  $K^+$  channel in vascular smooth

- muscle: relationship between K<sub>Ca</sub> channel diversity and smooth muscle cell function. *Circ Res* 1999;**85**:e33–e43.
21. Kohler R, Wulff H, Eichler I, Kneifel M, Neumann D, Knorr A et al. Blockade of the intermediate-conductance calcium-activated potassium channel as a new therapeutic strategy for restenosis. *Circulation* 2003;**108**:1119–1125.
  22. Cheong A, Bingham AJ, Li J, Kumar B, Sukumar P, Munsch C et al. Downregulated REST transcription factor is a switch enabling critical potassium channel expression and cell proliferation. *Mol Cell* 2005;**20**:45–52.
  23. Si H, Grgic I, Heyken WT, Maier T, Hoyer J, Reusch HP et al. Mitogenic modulation of Ca<sup>2+</sup>-activated K<sup>+</sup> channels in proliferating A7r5 vascular smooth muscle cells. *Br J Pharmacol* 2006;**148**:909–917.
  24. Tharp DL, Wamhoff BR, Turk JR, Bowles DK. Upregulation of intermediate-conductance Ca<sup>2+</sup>-activated K<sup>+</sup> channel (IKCa1) mediates phenotypic modulation of coronary smooth muscle. *Am J Physiol Heart Circ Physiol* 2006;**291**:H2493–H2503.
  25. Tharp DL, Wamhoff BR, Wulff H, Raman G, Cheong A, Bowles DK. Local delivery of the KCa3.1 blocker, TRAM-34, prevents acute angioplasty-induced coronary smooth muscle phenotypic modulation and limits stenosis. *Arterioscler Thromb Vasc Biol* 2008;**28**:1084–1089.
  26. George CK, Wulff H, Beeton C, Pennington M, Gutman GA, Cahalan MD. K<sup>+</sup> channels as targets for specific immunomodulation. *Trends Pharmacol Sci* 2004;**25**:280–289.
  27. Coetzee WA, Amarillo Y, Chiu J, Chow A, Lau D, McCormack T et al. Molecular diversity of K<sup>+</sup> channels. *Ann N Y Acad Sci* 1999;**868**:233–285.
  28. Rangaraju S, Chi V, Pennington MW, Chandy KG. Kv1.3 potassium channels as a therapeutic target in multiple sclerosis. *Expert Opin Ther Targets* 2009;**13**:909–924.
  29. Fountain SJ, Cheong A, Flemming R, Mair L, Sivaprasadarao A, Beech DJ. Functional up-regulation of KCNA gene family expression in murine mesenteric resistance artery smooth muscle. *J Physiol* 2004;**556**:29–42.
  30. Madi HA, Riches K, Warburton P, O'Regan DJ, Turner NA, Porter KE. Inherent differences in morphology, proliferation, and migration in saphenous vein smooth muscle cells cultured from nondiabetic and Type 2 diabetic patients. *Am J Physiol Cell Physiol* 2009;**297**:C1307–C1317.
  31. Cheong A, Dedman AM, Xu SZ, Beech DJ. KV  $\alpha$ 1 channels in murine arterioles: differential cellular expression and regulation of diameter. *Am J Physiol Heart Circ Physiol* 2001;**281**:H1057–H1065.
  32. Garcia-Calvo M, Leonard RJ, Novick J, Stevens SP, Schmalhofer W, Kaczorowski GJ et al. Purification, characterization, and biosynthesis of margatoxin, a component of *Centruroides margaritatus* venom that selectively inhibits voltage-dependent potassium channels. *J Biol Chem* 1993;**268**:18866–18874.
  33. Koo GC, Blake JT, Shah K, Staruch MJ, Dumont F, Wunderler D et al. Correolide and derivatives are novel immunosuppressants blocking the lymphocyte Kv1.3 potassium channels. *Cell Immunol* 1999;**197**:99–107.
  34. Wulff H, Calabresi PA, Allie R, Yun S, Pennington M, Beeton C et al. The voltage-gated Kv1.3 K<sup>+</sup> channel in effector memory T cells as new target for MS. *J Clin Invest* 2003;**111**:1703–1713.
  35. Fadool DA, Tucker K, Perkins R, Fasciani G, Thompson RN, Parsons AD et al. Kv1.3 channel gene-targeted deletion produces 'Super-Smeller Mice' with altered glomeruli, interacting scaffolding proteins, and biophysics. *Neuron* 2004;**41**:389–404.
  36. Vennekamp J, Wulff H, Beeton C, Calabresi PA, Grissmer S, Hansel W et al. Kv1.3-blocking 5-phenylalkoxypsoralens: a new class of immunomodulators. *Mol Pharmacol* 2004;**65**:1364–1374.
  37. Nelson MT, Quayle JM. Physiological roles and properties of potassium channels in arterial smooth muscle. *Am J Physiol* 1995;**268**:C799–C822.
  38. Archer SL, Souil E, Dinh-Xuan AT, Schremmer B, Mercier JC, El Yaagoubi A et al. Molecular identification of the role of voltage-gated K<sup>+</sup> channels, Kv1.5 and Kv2.1, in hypoxic pulmonary vasoconstriction and control of resting membrane potential in rat pulmonary artery myocytes. *J Clin Invest* 1998;**101**:2319–2330.
  39. Chen TT, Luykenaar KD, Walsh EJ, Walsh MP, Cole WC. Key role of Kv1 channels in vasoregulation. *Circ Res* 2006;**99**:53–60.
  40. Cidat P, Moreno-Dominguez A, Novensa L, Roque M, Barquin L, Heras M et al. Characterization of ion channels involved in the proliferative response of femoral artery smooth muscle cells. *Arterioscler Thromb Vasc Biol* 2010;**30**:1203–1211.
  41. Moudgil R, Michelakis ED, Archer SL. The role of K<sup>+</sup> channels in determining pulmonary vascular tone, oxygen sensing, cell proliferation, and apoptosis: implications in hypoxic pulmonary vasoconstriction and pulmonary arterial hypertension. *Microcirculation* 2006;**13**:615–632.
  42. Lin CS, Boltz RC, Blake JT, Nguyen M, Talento A, Fischer PA et al. Voltage-gated potassium channels regulate calcium-dependent pathways involved in human T lymphocyte activation. *J Exp Med* 1993;**177**:637–645.
  43. Kotecha SA, Schlichter LC. A Kv1.5 to Kv1.3 switch in endogenous hippocampal microglia and a role in proliferation. *J Neurosci* 1999;**19**:10680–10693.
  44. Felipe A, Vicente R, Villalonga N, Roura-Ferrer M, Martinez-Marmol R, Sole L et al. Potassium channels: new targets in cancer therapy. *Cancer Detect Prev* 2006;**30**:375–385.
  45. Cook KK, Fadool DA. Two adaptor proteins differentially modulate the phosphorylation and biophysics of Kv1.3 ion channel by SRC kinase. *J Biol Chem* 2002;**277**:13268–13280.
